# Supplementary material for: Expanding Tuberculosis Drug Resistance Prediction beyond binary: Deep Learning for Minimum Inhibitory Concentration prediction
Source: Research Square preprint supplement (doi:10.21203/rs.3.rs-7621453/v1), 2025-11-10
Supplement: Supplementary file 1 [file 35488b92ab104a29565dae4b.docx]

**SUPPLEMENTARY INFORMATION**

**Supplementary Figure 1**

**MIC Value distribution for each drug** Sample size distribution across antibiotics in the CRyPTIC dataset, showing the number of MIC-labelled isolates per drug.


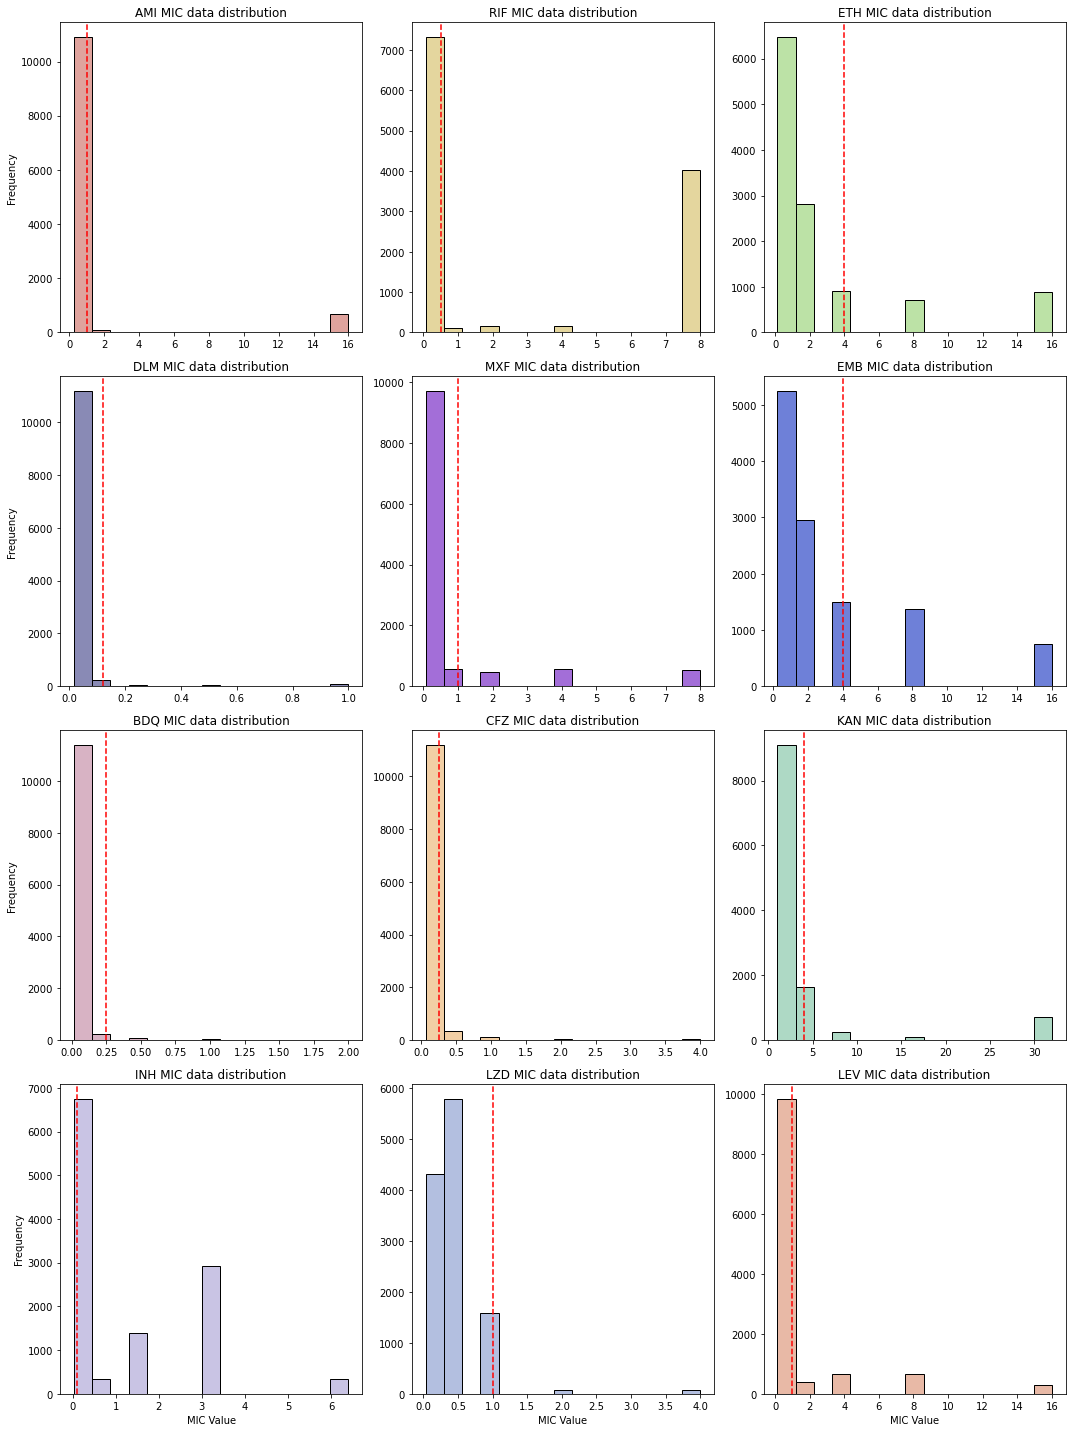


**Supplementary Figure 2**

**Stack plot for MIC value prediction**

This figure presents stacked bar charts of correct vs. incorrect predictions for binary-supported CNN (left column) and XGBoost (right column) across four drugs (top to bottom) (AMI, BDQ, RIF, EMB)


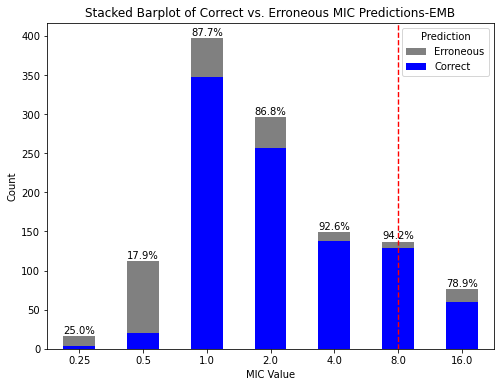

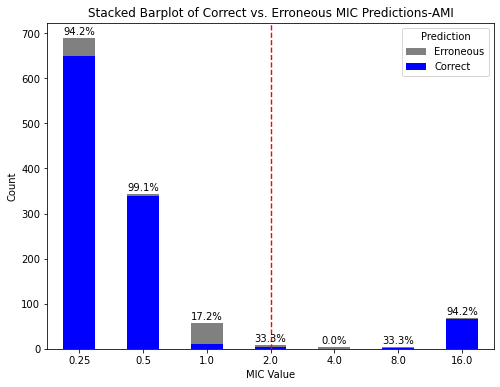

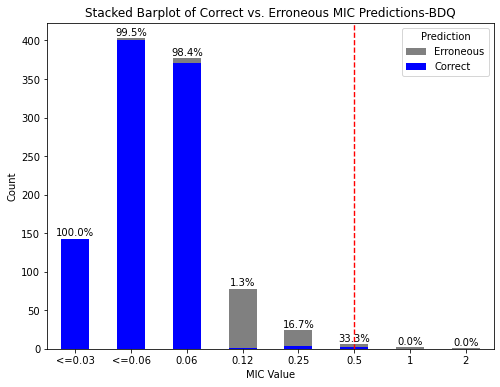

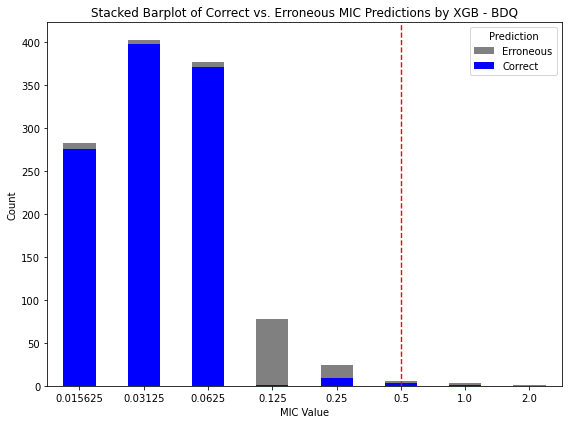

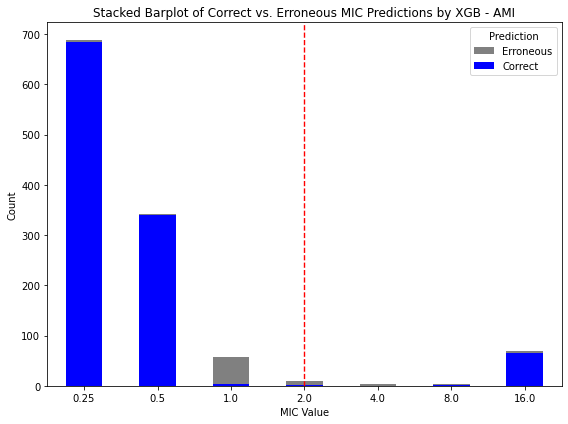

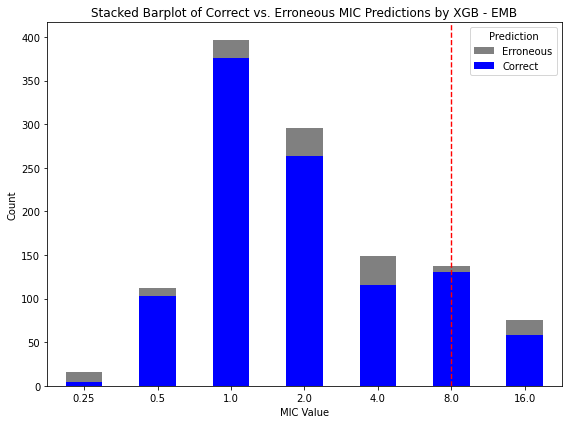

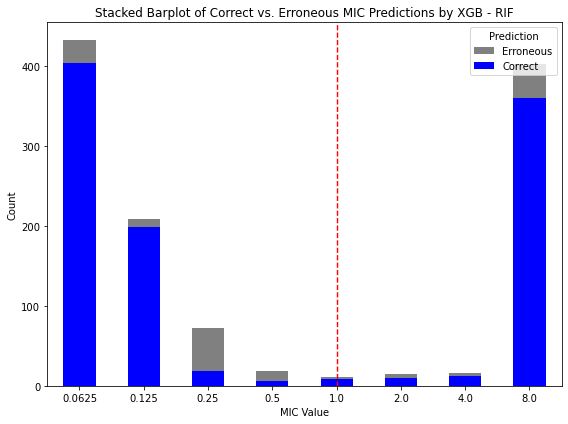

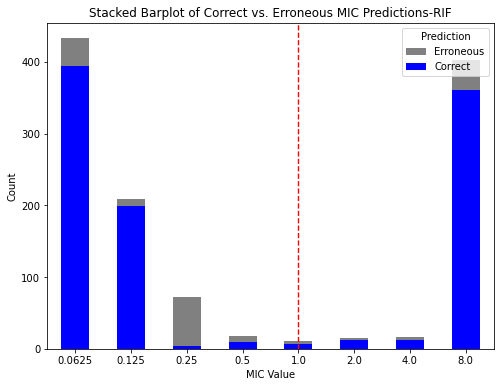


AMI

BDQ

RIF

EMB

**Supplementary Figure 3**

**Sankey plot for MIC value prediction**

A comparative visualisation of prediction distributions for binary-supported CNN (left column) and XGBoost (right column) across four drugs (top to bottom) - amikacin (AMI), bedaquiline (BDQ), rifampicin (RIF), and ethambutol (EMB) - with paired Sankey diagrams showing true MIC on the left the Sankey plot and predicted MIC on the right side of the Sankey plot.


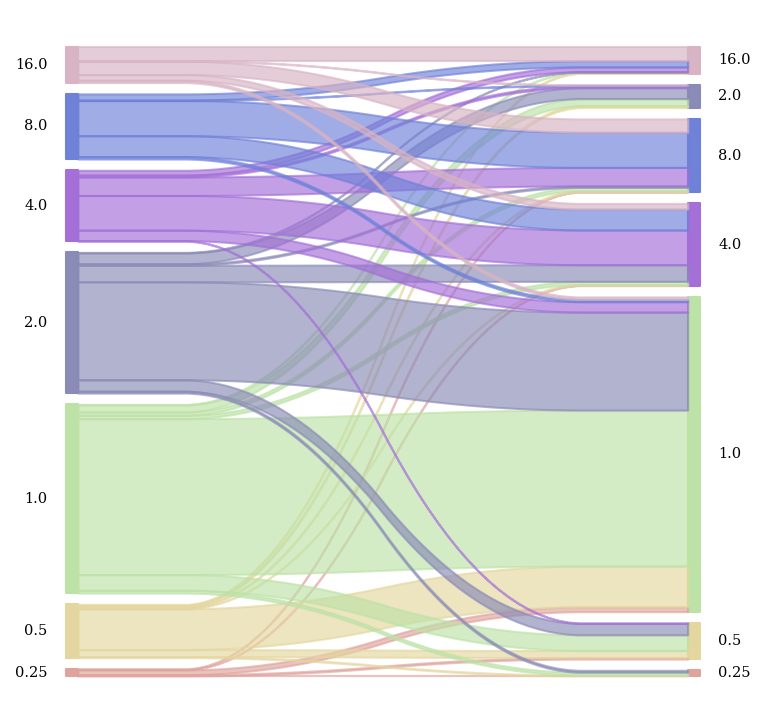

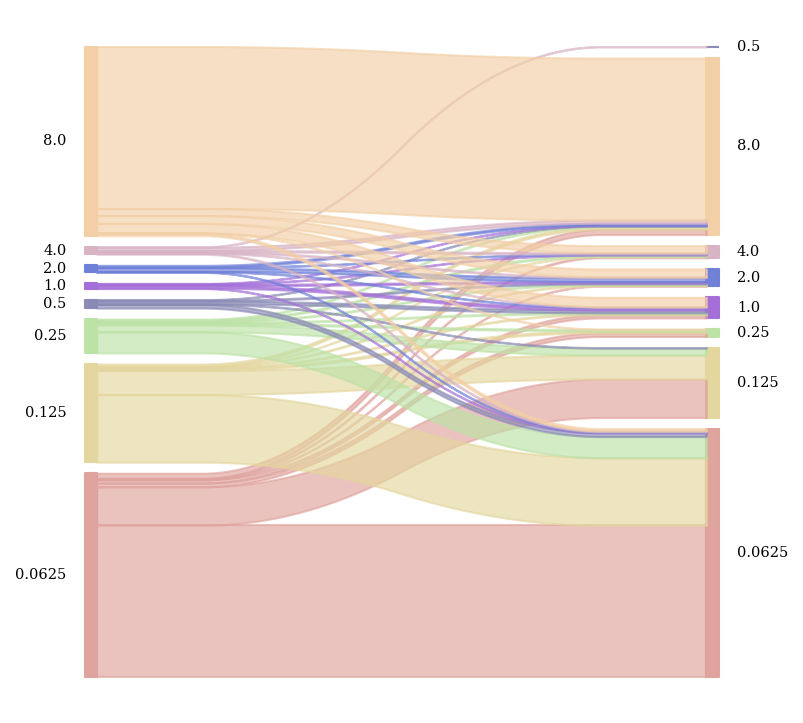

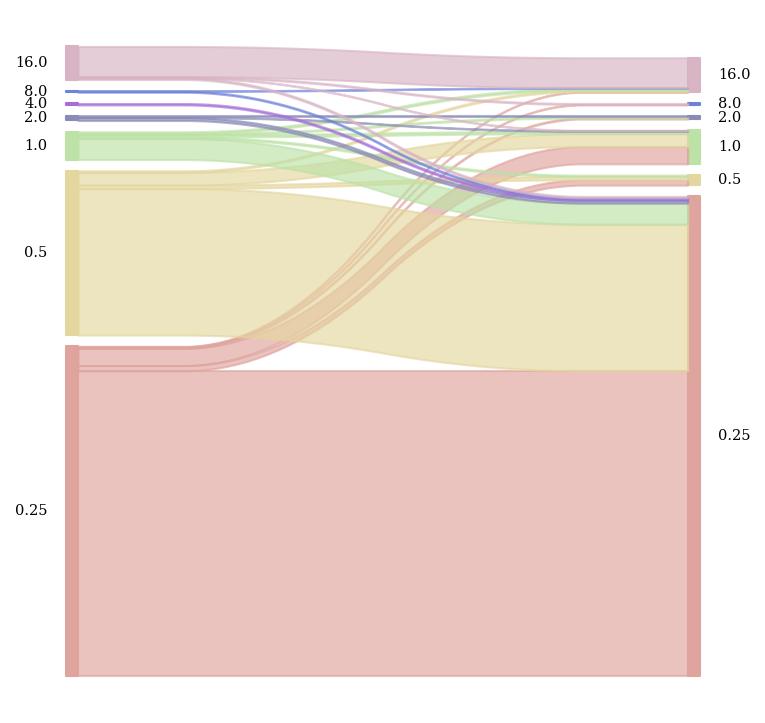

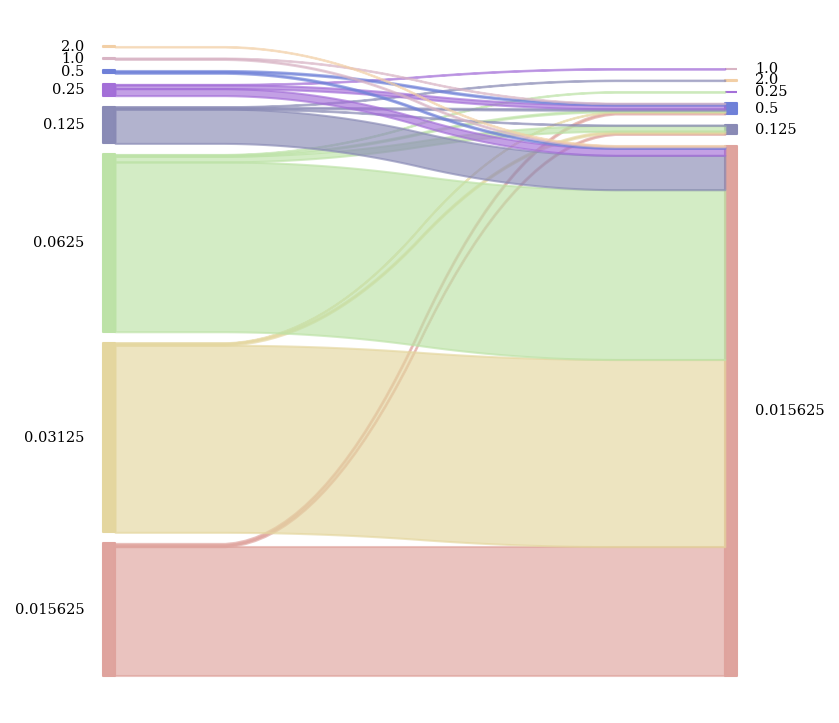

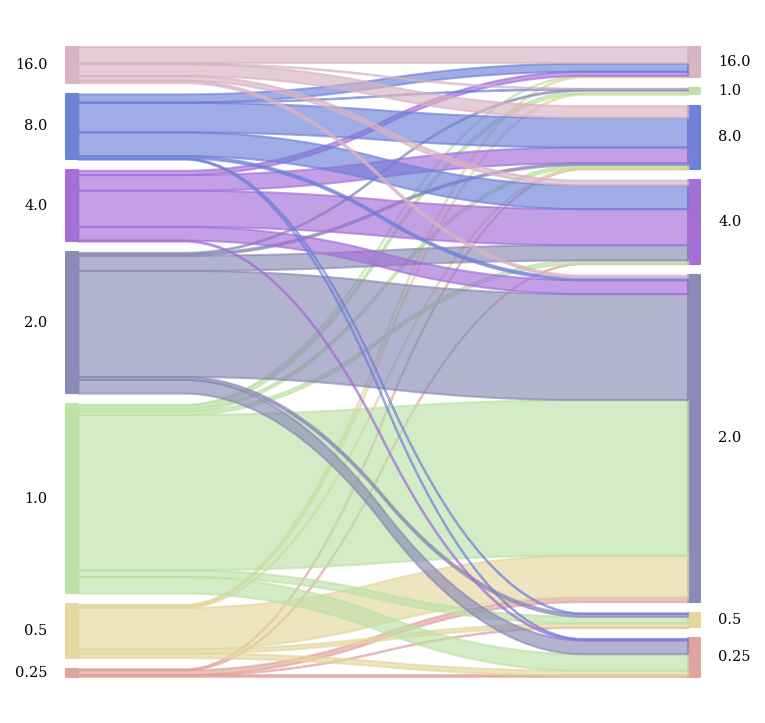

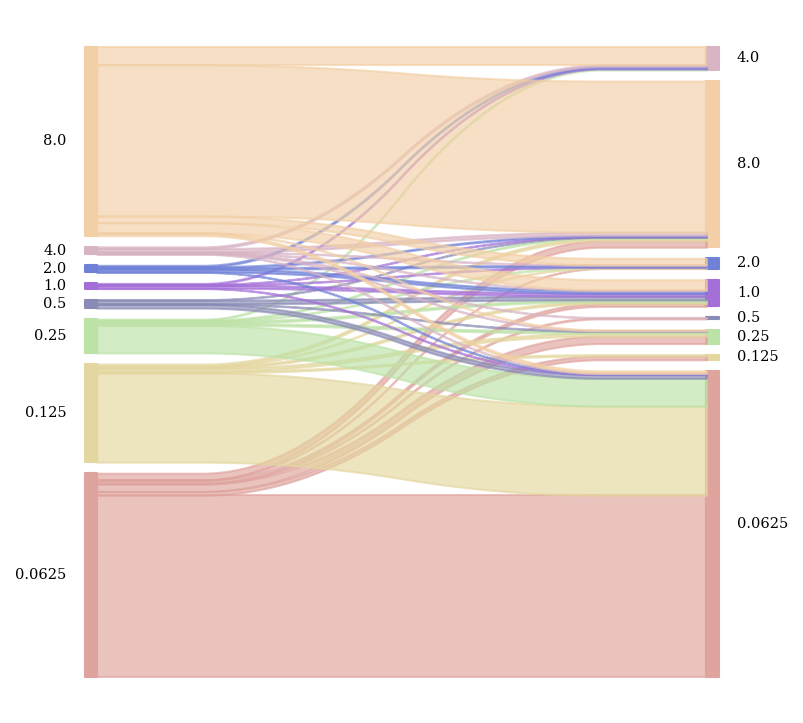

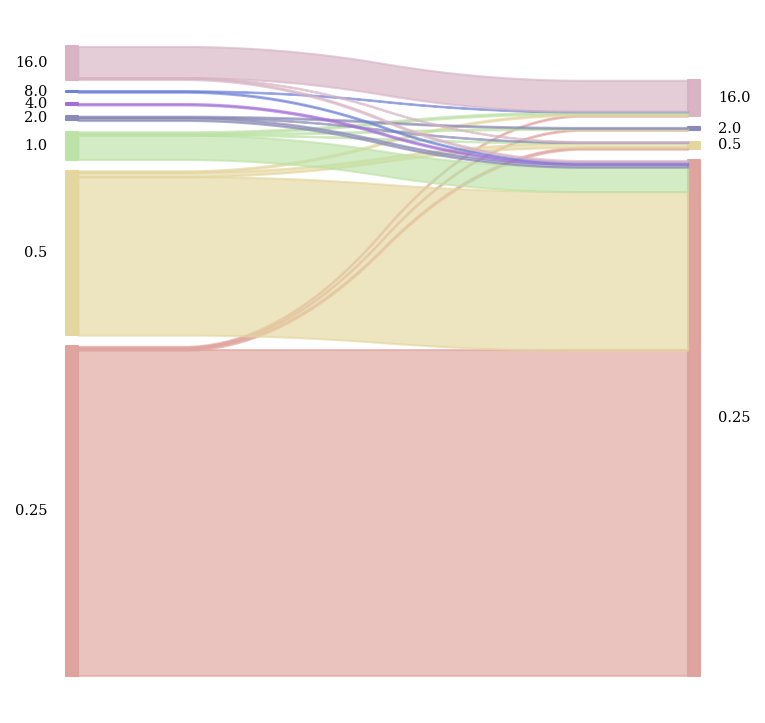

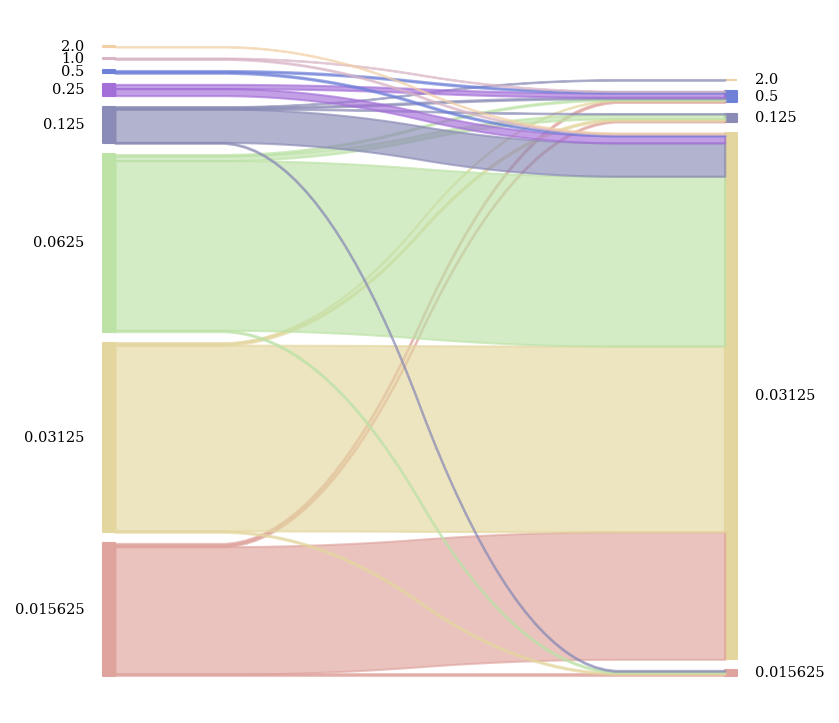


AMI

BDQ

RIF

EMB

**Supplementary Table 1**

Top 20 predictive genomic features ranked by their impact on model output (ranked by IGabs) for rifampicin resistance.

| **Gene** | **Change** | **Delta AUC** | **IG direction** | **IGabs** |
| --- | --- | --- | --- | --- |
| Binary Drug resistance input | | 4.21e+00 | 4.21e+00 | 1.01e+01 |
| *rpoA* | c.141C>G | 5.76e-02 | 5.76e-02 | 5.76e-02 |
| *rpoC* | Val1039Gly | 5.26e-02 | 5.26e-02 | 5.26e-02 |
| *rpoA* | Ile3Val | 5.25e-02 | 5.25e-02 | 5.25e-02 |
| *rpoC* | Leu1245Arg | 3.19e-02 | 3.19e-02 | 3.19e-02 |
| *rpoC* | c.339T>C | -1.81e-02 | -1.81e-02 | 2.41e-02 |
| *Rv2752c* | Gly28Ser | -2.41e-02 | -2.41e-02 | 2.41e-02 |
| *rpoC* | Val684Ile | 2.32e-02 | 2.32e-02 | 2.32e-02 |
| *rpoC* | Leu516Pro | 1.82e-02 | 1.82e-02 | 2.01e-02 |
| *rpoC* | Val431Met | 2.00e-02 | 2.00e-02 | 2.00e-02 |
| *rpoB* | Val970Met | -1.97e-02 | -1.97e-02 | 1.97e-02 |
| *rpoC* | Pro833Leu | 1.54e-02 | 1.54e-02 | 1.54e-02 |
| *rpoC* | Glu266Gln | 1.41e-02 | 1.41e-02 | 1.41e-02 |
| *rpoA* | c.74_73insCAACCCA | 1.39e-02 | 1.39e-02 | 1.39e-02 |
| *rpoC* | Glu948Ala | 1.34e-02 | 1.34e-02 | 1.34e-02 |
| *rpoA* | c.120T>A | 1.30e-02 | 1.30e-02 | 1.30e-02 |
| *rpoA* | c.111A>C | -7.57e-03 | -7.57e-03 | 1.19e-02 |
| *rpoA* | c.88C>T | 1.19e-02 | 1.19e-02 | 1.19e-02 |
| *rpoB* | c.112G>A | 1.16e-02 | 1.16e-02 | 1.16e-02 |
| *rpoB* | Asp435Tyr | 1.07e-02 | 1.07e-02 | 1.07e-02 |
| *rpoB* | Gly463Trp | 9.80e-03 | 9.80e-03 | 9.80e-03 |

ΔAUC: Change in model AUC upon feature ablation, indicating its impact on predictive performance. IG direction: Signed integrated gradients attribution; positive values support resistance prediction, negative oppose. IG abs: Absolute integrated gradients magnitude, representing feature importance regardless of direction.

**Supplementary Table 2. MIC value transformation**

| **Amikacin** | | **Bedaquiline** | | **Clofazimine** | |
| --- | --- | --- | --- | --- | --- |
| Raw | Transformed | Raw | Transformed | Raw | Transformed |
| <=0.25 | 0.25 | <=0.015 | 0.015625 | <=0.015 | 0.015625 |
| 0.5 | 0.5 | 0.03 | 0.03125 | 0.03 | 0.03125 |
| 1 | 1 | 0.06 | 0.0625 | 0.06 | 0.0625 |
| 2 | 2 | 0.12 | 0.125 | 0.12 | 0.125 |
| 4 | 4 | 0.25 | 0.25 | 0.25 | 0.25 |
| 8 | 8 | 0.5 | 0.5 | 0.5 | 0.5 |
| >8 | 16 | 1 | 1 | 1 | 1 |
|  |  | >1 | 2 | >2 | 4 |
| **Delamanid** | | **Ethambutol** | | **Ethionamide** | |
| Raw | Transformed | Raw | Transformed | Raw | Transformed |
| <=0.015 | 0.0078125 | 0.5 | 0.5 | 0.5 | 0.5 |
| 0.015 | 0.015625 | 1 | 1 | 1 | 1 |
| 0.03 | 0.03125 | 2 | 2 | 2 | 2 |
| 0.06 | 0.0625 | 4 | 4 | 4 | 4 |
| 0.12 | 0.125 | 8 | 8 | 8 | 8 |
| 0.25 | 0.25 | >8 | 16 | >8 | 16 |
| 0.5 | 0.5 |  |  |  |  |
| >0.5 | 1 |  |  |  |  |
| **Isoniazid** | | **Kanamycin** | | **Levofloxacin** | |
| Raw | Transformed | Raw | Transformed | Raw | Transformed |
| <=0.025 | 0.025 | <=1 | 1 | <=0.12 | 0.125 |
| 0.05 | 0.05 | 2 | 2 | 0.25 | 0.25 |
| 0.1 | 0.1 | 4 | 4 | 0.5 | 0.5 |
| 0.2 | 0.2 | 8 | 8 | 1 | 1 |
| 0.4 | 0.4 | 16 | 16 | 2 | 2 |
| 0.8 | 0.8 | >16 | 32 | 4 | 4 |
| 1.6 | 1.6 |  |  | 8 | 8 |
| >1.6 | 3.2 |  |  | >8 | 16 |
| **Linezolid** | | **Moxifloxacin** | | **Rifampicin** | |
| Raw | Transformed | Raw | Transformed | Raw | Transformed |
| <=0.03 | 0.015625 | <=0.06 | 0.03 | <=0.06 | 0.03125 |
| 0.06 | 0.0625 | 0.12 | 0.125 | 0.06 | 0.0625 |
| 0.12 | 0.125 | 0.25 | 0.25 | 0.12 | 0.125 |
| 0.25 | 0.25 | 0.5 | 0.5 | 0.25 | 0.25 |
| 0.5 | 0.5 | 1 | 1 | 0.5 | 0.5 |
| 1 | 1 | 2 | 2 | 1 | 1 |
| 2 | 2 | 4 | 4 | 2 | 2 |
| >2 | 4 | >4 | 8 | >4 | 8 |
|  |  |  |  | >8 | 16 |

**Supplementary Table 3. CNN architecture**

| **Component** | **Layer Type** | **Details** |
| --- | --- | --- |
| Input | – | 1D sequence tensor (B, 1, L), plus scalar additional input |
| Feature Extraction | Conv1D + BatchNorm + ReLU | Filters: 64, Kernel: 25 |
| Conv Block 1 × 2 | Dropout + Conv1D + BN + ReLU + MaxPool1D | Filter scaling applied, Kernel: 3, Pool: 3 |
| Conv Block 2 × 2 | Dropout + Conv1D + BN + ReLU + MaxPool1D | Fixed filters: 32, Kernel: 3, Pool: 3 |
| Flatten | – | Flatten before dense layers |
| Dense Block × 2 | Dropout + Linear + BN + ReLU | Hidden units: 128 |
| Concatenation | – | Concatenate scalar additional input (reshaped to B×1) |
| Prediction Head | Linear → ReLU → Dropout → Linear → ReLU → Dropout → Linear | Output: 6 classes |
| Activation | – | Softmax applied externally during evaluation |
| Regularization | Dropout, L1 penalty | conv_dropout = 0.4, dense_dropout = 0.7, L1 = 0.1 |
| Output | Linear (number of MIC classes,) | Logits for multi-class classification |
